# Supplementary material for: In vitro fermentation reveals an interplay relationship between oat β-glucan and human gut Bacteroides and their potential role in regulating gut cytokines
Source: Royal Society of Chemistry journal article supplement (doi:10.1039/d4fo00775a), 2024-01-01
Supplement: d4fo00775a2.pdf [file d4fo00775a2.pdf]

1

## Supplementary material

2 ***In vitro* fermentation reveals interplay relationship between oat  $\beta$ -glucan and**  
3 **human gut *Bacteroides* and their potential role in regulating gut cytokines**

4 Junying Bai<sup>1, 2, 3, #</sup>, Jing Wang<sup>2, #</sup>, Mingcong Fan<sup>2</sup>, Yan Li<sup>2</sup>, Linhua Huang<sup>1, 3</sup>, and Li  
5 Wang<sup>2, \*</sup>

6 <sup>1</sup> Citrus Research Institute, Southwest University, Chongqing 400712, China.

7 <sup>2</sup> School of Food Science and Technology, Jiangnan University, Wuxi 214122, China.

8 <sup>3</sup> National Citrus Engineering Research Center, Chongqing, 400712, China.

9

10 # These authors contributed equally to this work

11 \* To whom correspondence may be addressed

12

### 13 **Contact information for First Author**

14 E-mail address: [baijunying@swu.edu.cn](mailto:baijunying@swu.edu.cn) (Junying Bai)

15 Complete mailing address: Room 620, School of Food Science and Technology,  
16 Jiangnan University, 1800 Lihu Road, Wuxi 214122, Jiangsu, People's Republic of  
17 China

### 18 **Contact information for Corresponding Author**

19 E-mail address: [w10519@163.com](mailto:w10519@163.com) (Li Wang)

20 Complete mailing address: Room 619, School of Food Science and Technology,  
21 Jiangnan University, 1800 Lihu Road, Wuxi 214122, Jiangsu, People's Republic of  
22 China

24 **Table S1. Details for specific medium plates for *Bacteroides* isolation**

| <b>Reagents</b>          | <b>Amount (/L)</b> |
|--------------------------|--------------------|
| Brucella agar            | 43.1 g             |
| Sheep blood              | 50 mL              |
| L-Cysteine hydrochloride | 0.1 g              |
| Hemin                    | 10 mg              |
| Vitamin K1               | 2 mg               |
| Kanamycin                | 0.1 g              |
| Vancomycin               | 0.75 mg            |

25

27 **Table S2. Detailed information for primer sequence**

| <b>Gene</b>   | <b>Sense sequence (5'→3')</b> | <b>Antisense sequence (5'→3')</b> |
|---------------|-------------------------------|-----------------------------------|
| TNF- $\alpha$ | GGTGCCTATGTCTCAGCCTCTT        | GCCATAGAAGTACTGATGAGAGGGAG        |
| IL-6          | TACCACTTCACAAGTCGGAGGC        | CTGCAAGTGCATCATCGTTGTTC           |
| GAPDH         | ACATCATCCCTGCATCCACT          | GTCCTCAGTGTAGCCCAAG               |

Note: TNF- $\alpha$ , tumor necrosis factor- $\alpha$ ; IL-6, interleukin-6; GAPDH, glyceraldehyde-3-phosphate dehydrogenase



33 **Table S4. Gene annotation overview of two *Bacteroides* strains using different**

34 **databases**

| <b>No.</b> | <b>Strain</b>                          | <b>NR</b> | <b>Swiss-Prot</b> | <b>Pfam</b> | <b>COG</b> | <b>GO</b> | <b>KEGG</b> |
|------------|----------------------------------------|-----------|-------------------|-------------|------------|-----------|-------------|
| 1          | <i>Bacteroides xylanisolvens</i> Bac02 | 5483      | 2892              | 4151        | 3769       | 3330      | 1751        |
| 2          | <i>Bacteroides koreensis</i> Bac08     | 5525      | 2966              | 4163        | 3763       | 3388      | 1748        |

35 Note: NR, non-redundant protein database; COG, Clusters of Orthologous Groups of

36 proteins; GO, Gene Ontology; KEGG, Kyoto Encyclopedia of Genes and Genomes

37

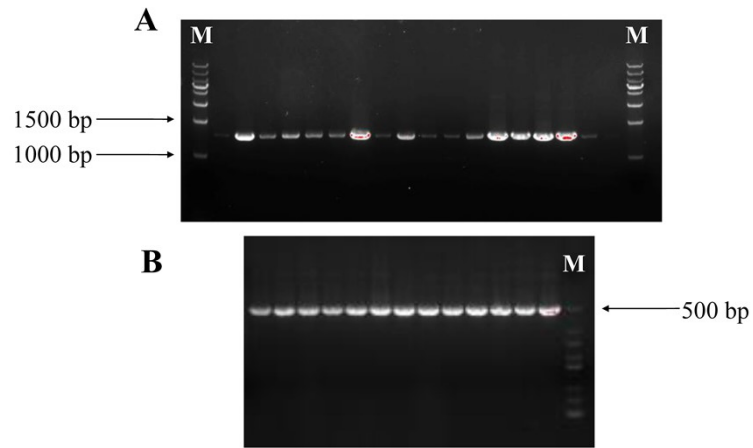

39

40 **Fig. S1.** Representative PCR detection of isolated gut microbes from healthy adult  
 41 human. The DNA bands are shown on the gel and M indicates the marker (500 bp-  
 42 15000 bp). The amplified fragments (A) using the universal primer for 16S rRNA and  
 43 (B) using the specific primer for *Bacteroides* are respectively displayed.

44

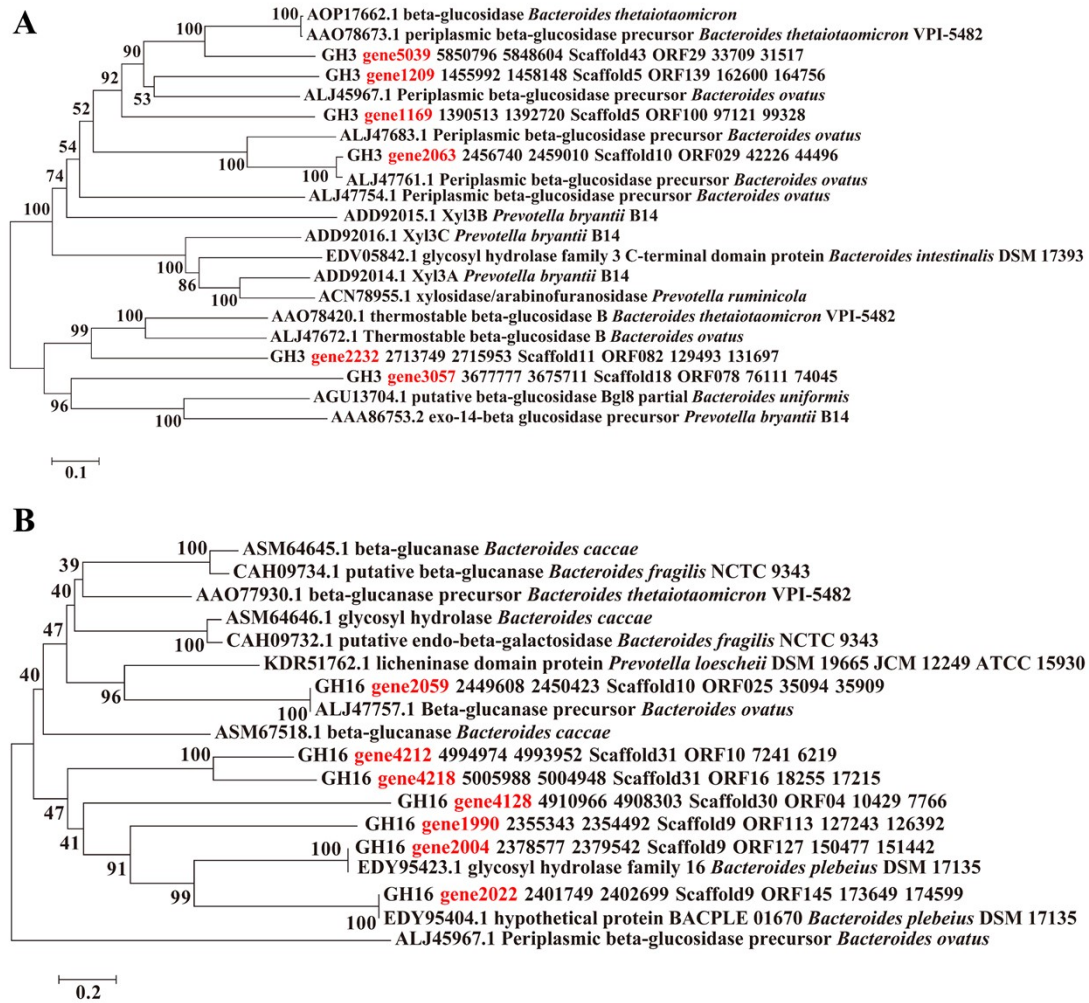

46

47 **Fig. S2.** Phylogenetic analysis of protein sequences of (A) GH3 and (B) GH16 from  
 48 gut *Bacteroides* strains indicates the similarity and difference of *Bacteroides*  
 49 *xylanisolvans* Bac02 strain sequences. The tree was inferred using the Neighbor-  
 50 Joining method, and values of bootstrap were marked next to the branches.

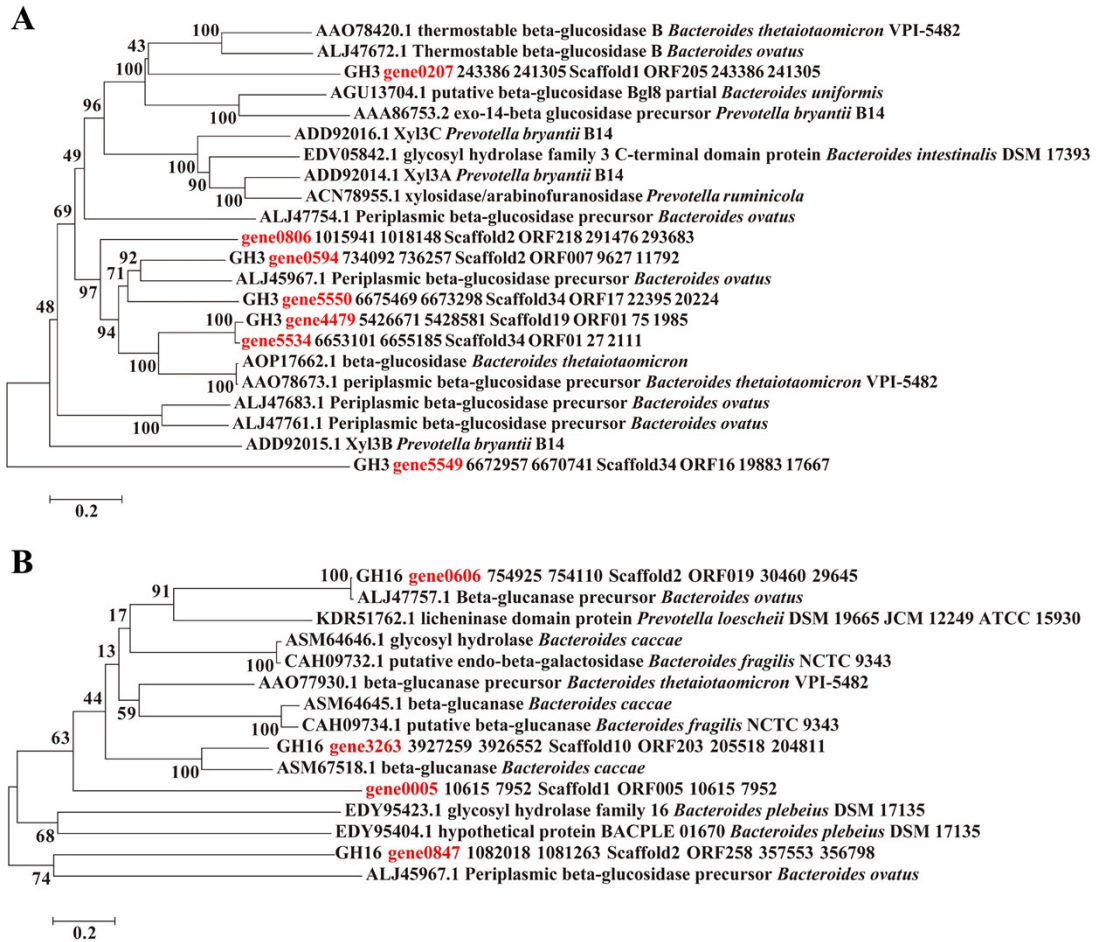

52

53 **Fig. S3.** Phylogenetic analysis of protein sequences of (A) GH3 and (B) GH16 from  
 54 gut *Bacteroides* strains indicates the similarity and difference of *Bacteroides*  
 55 *koreensis* Bac08 strain sequences. The tree was inferred using the Neighbor-Joining  
 56 method, and values of bootstrap were marked next to the branches.

57



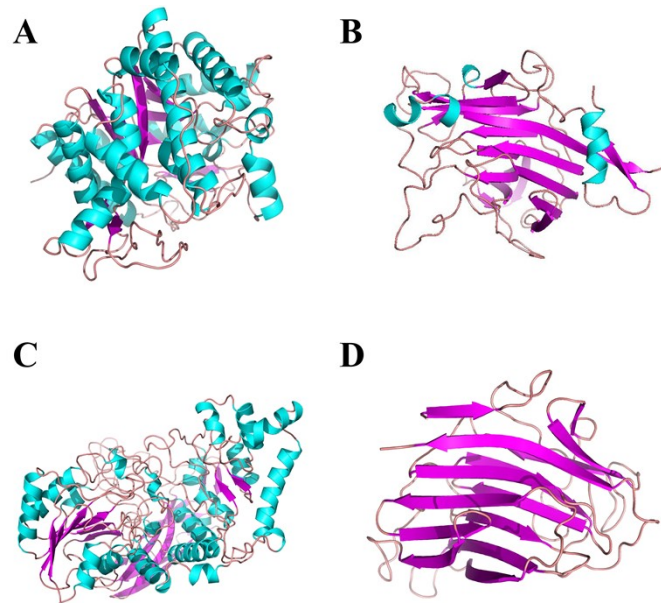

59

60 **Fig. S4.** Tertiary structure homology modeling of GH3 and GH16 from *Bacteroides*  
61 *xylanisolvans* Bac02 and *Bacteroides koreensis* Bac08 strains showing helical coils  
62 and flat ribbon protein secondary structures in cartoon representation: (A) *BxGH3*<sub>2063</sub>,  
63 (B) *BxGH16*<sub>2004</sub>, (C) *BkGH3*<sub>4479</sub>, and (D) *BkGH16*<sub>3263</sub>

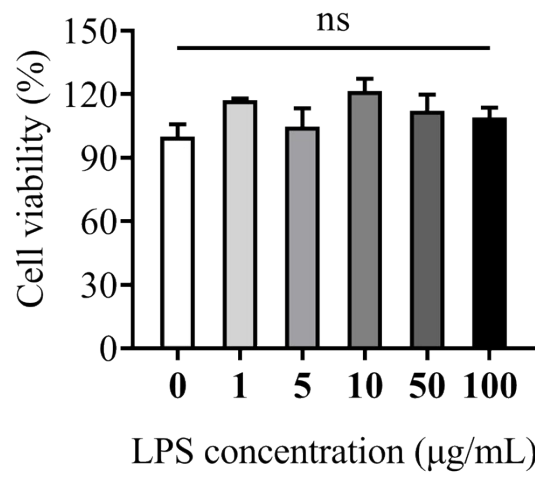

65

66 **Fig. S5.** The effect of LPS concentration on cell viability of Raw264.7 cells.

67 Differences were considered statistically not significant with a  $P > 0.05$ .

68

69
