# Supplementary figures and images for: In vitro fermentation reveals an interplay relationship between oat β-glucan and human gut Bacteroides and their potential role in regulating gut cytokines
Source: Royal Society of Chemistry journal article supplement (doi:10.1039/d4fo00775a), 2024-01-01

### 1 Original figures of electrophoresis data

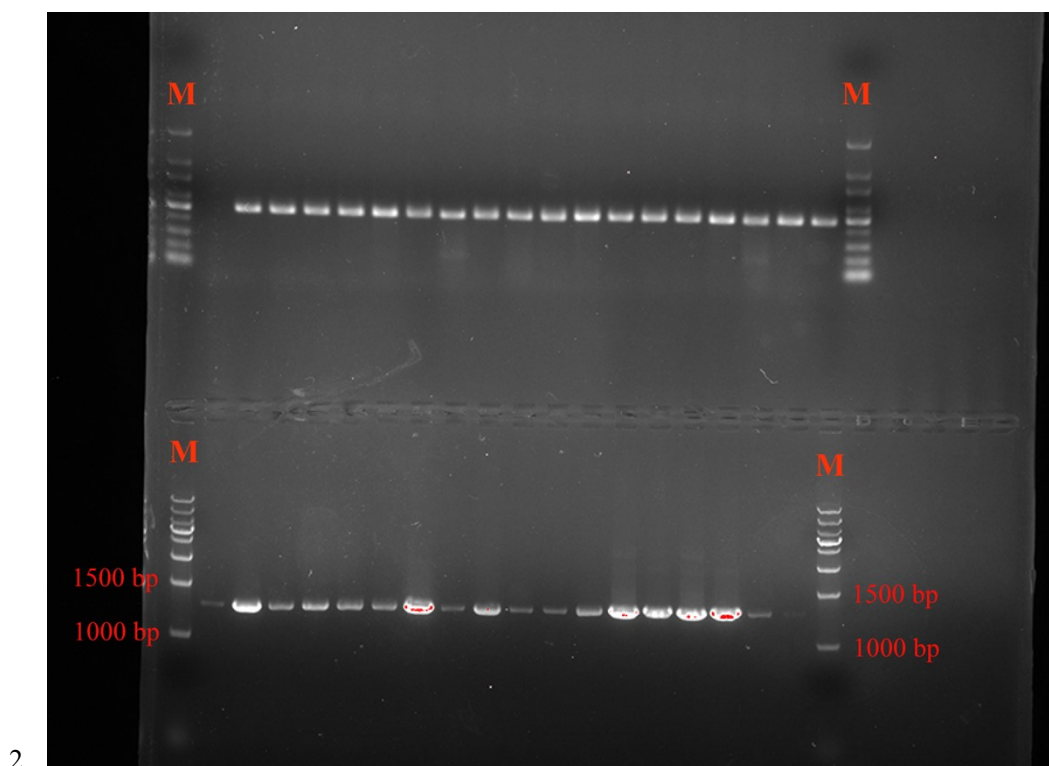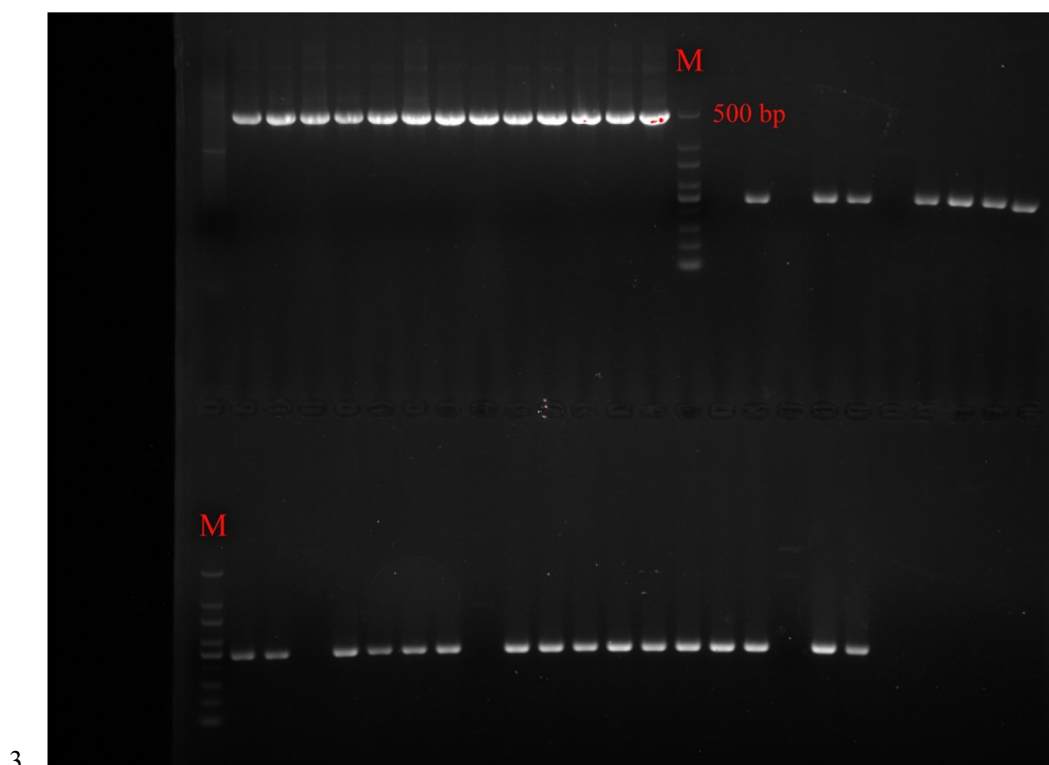

Supplement: d4fo00775a1.pdf [file d4fo00775a1.pdf]
